# Supplementary material for: Ocean biogeochemistry in the Canadian Earth System Model version 5.0.3: CanESM5 and CanESM5-CanOE
Source: Copernicus journal article supplement (doi:10.5194/gmd-2021-327), 2021-10-25

Mean surface nitrate concentration, July-October, 2°N-2°S

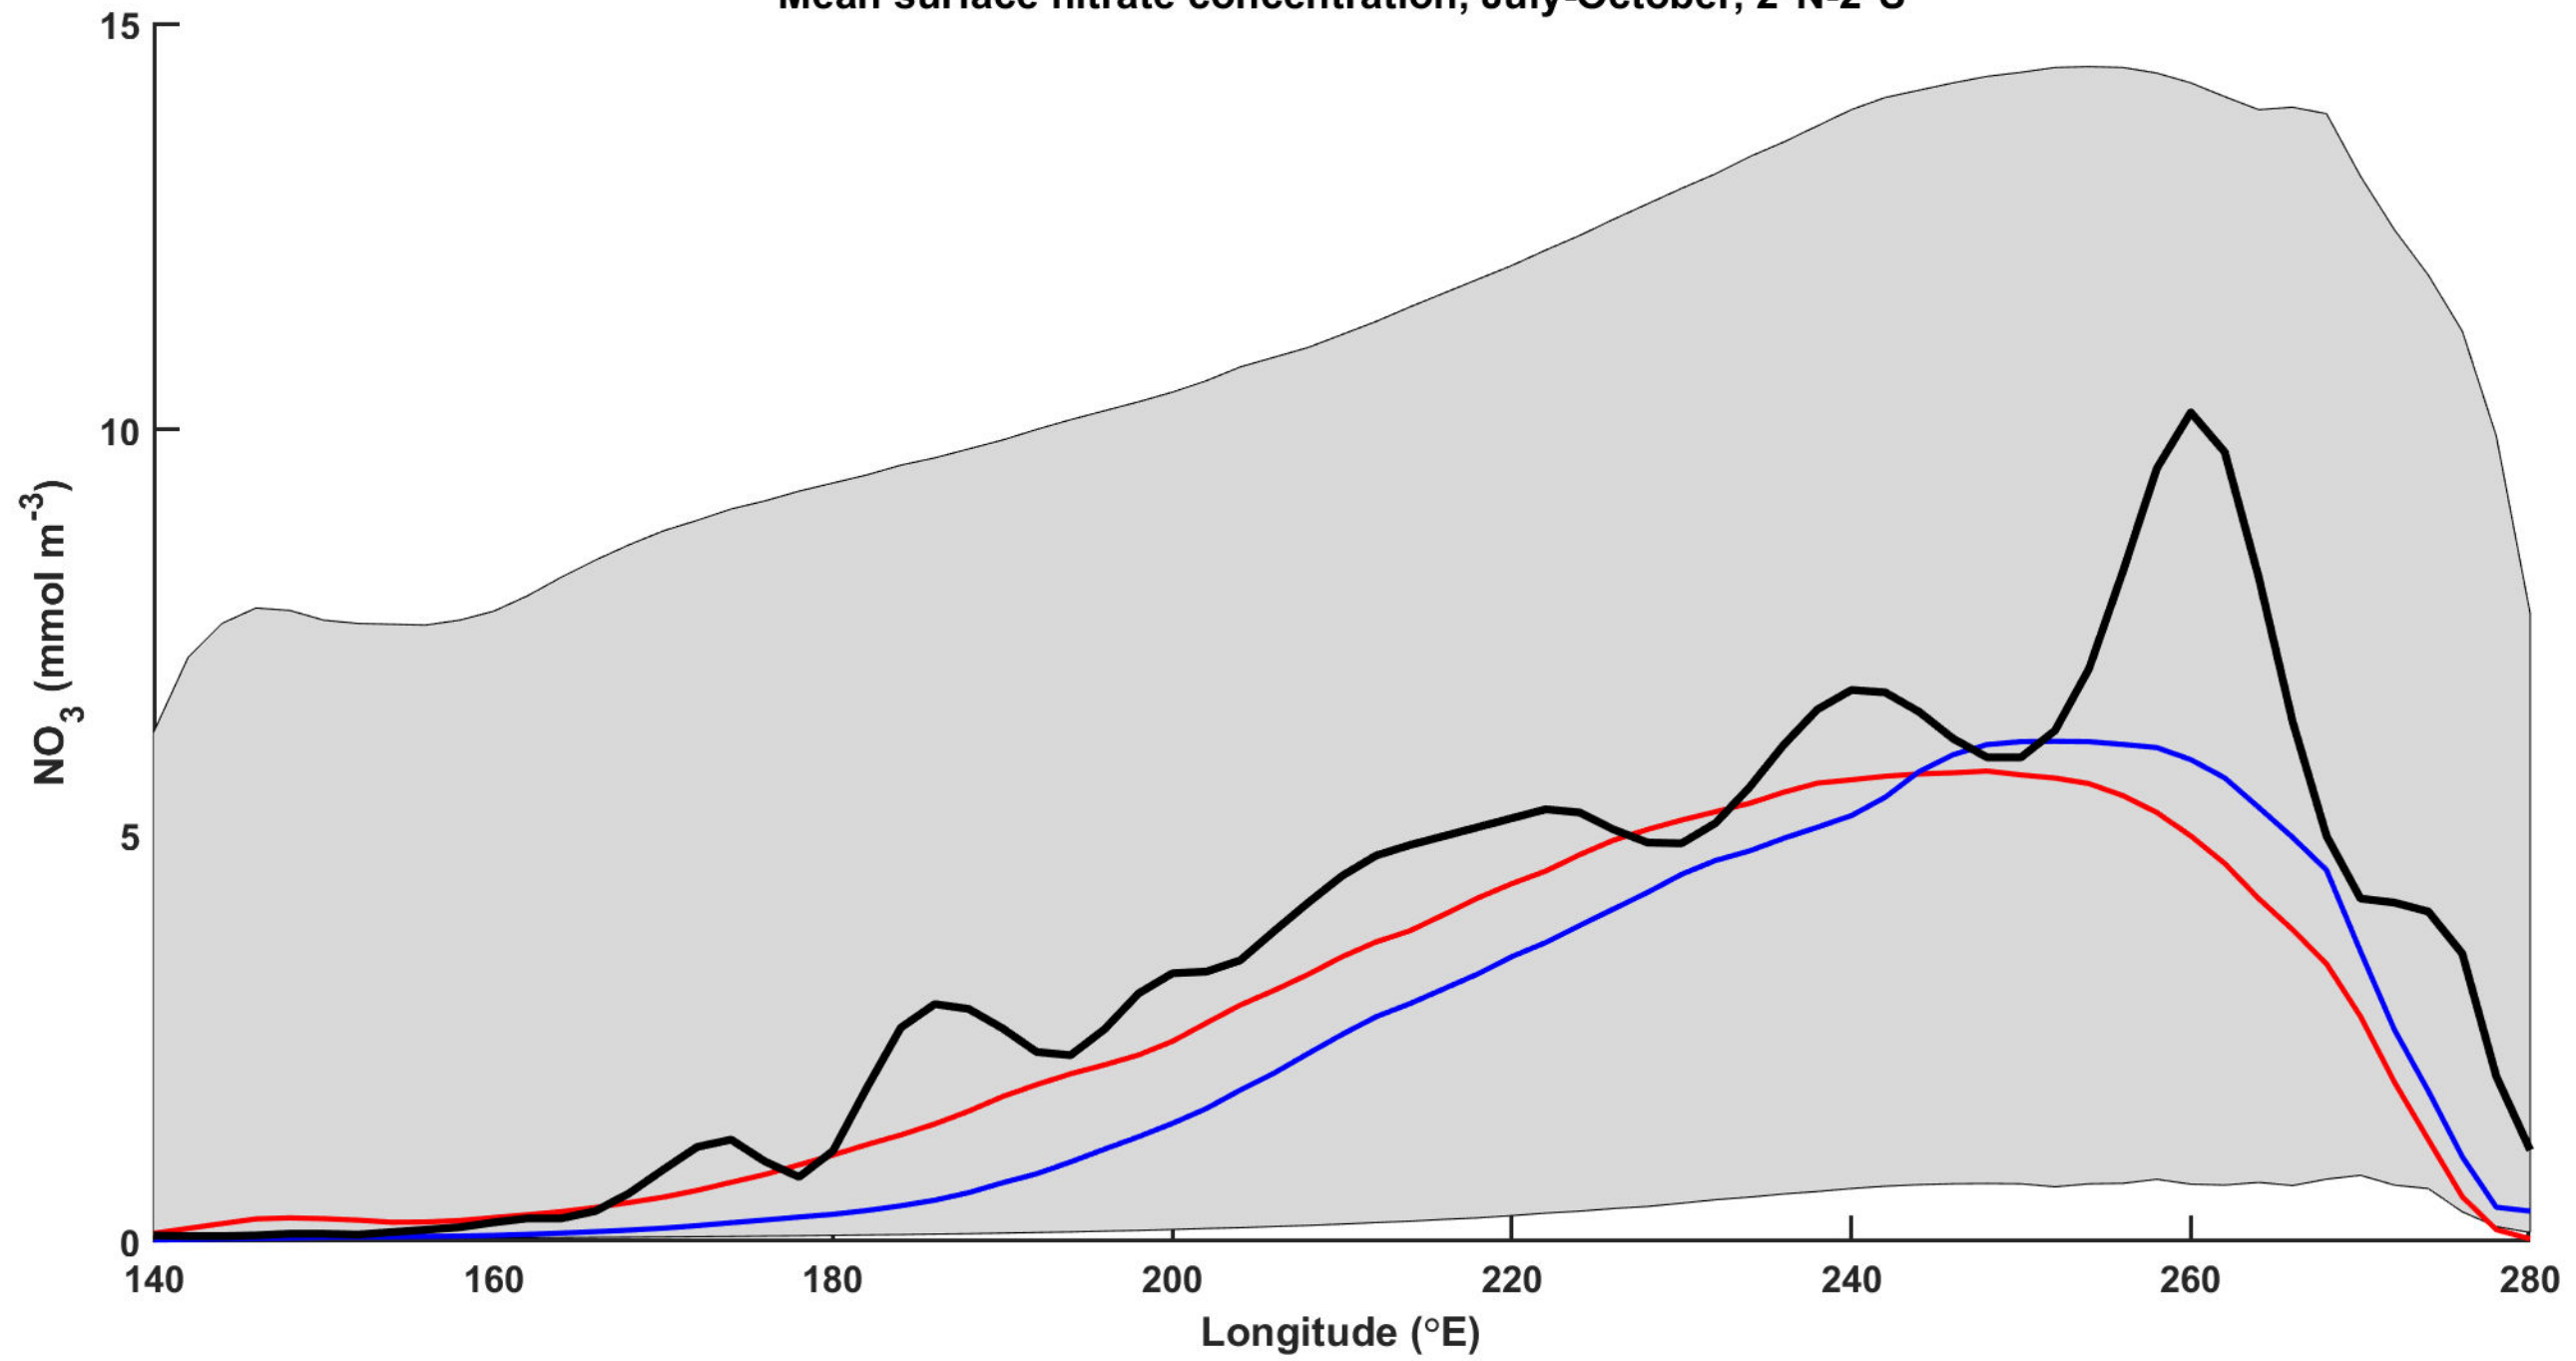

Supplement: Supplementary file [file gmd-2021-327-AC1-supplement.pdf]
